# Supplementary material
Source: MDPI journal article supplement (https://www.mdpi.com/2075-163X/10/11/1019)
Supplement: s1 [file s1]

## Sheet: Sheet1
Table S1. Mean values in corn production, soil chemical properties, carbon, nitrogen, and C/N after harvest of maize with different application rate in F1, F2, F3, F4, and F1-4.
F1	AR	Prod	pH	EC	Mg	Ca	Na	K	Cl	SO4	HCO3	CO3	SAR	ESP	C	N	C/N
	[wt%]	[kg/ha]	[-]	[dS/m]	[cmol/L]								[(cmol/L)1/2]	[%]	[%]	[%]	[-]
	0	2866.5	9.47611	0.204667	0.165713	0.166665	1.43778	0.030212	0.0274114	0.134083	0.883444	0.266667	5.08145	5.71803	1.41213	0.077272	19.856
	0.5	5507.5	9.25856	0.302222	0.145977	0.192208	1.67636	0.029754	0.0117449	0.512122	0.974444	0.0444444	6.37913	7.07262	1.79621	0.117059	16.7897
	1	6467	9.21456	0.213444	0.113711	0.160638	0.833027	0.0120155	0.0169252	0.157316	0.708889	0.0177778	3.55811	4.06709	1.54514	0.0910837	18.4744
	2	8011.67	9.02122	0.182333	0.185506	0.311468	0.834977	0.0171732	0.011646	0.410747	0.703667	0	2.81677	2.7688	1.94124	0.108351	18.6443
	3	8333.5	9.29167	0.226444	0.141995	0.23116	1.09259	0.0178779	0.00717196	0.21149	0.711111	0.164444	5.16963	6.26914	1.57877	0.0871384	21.1048
F2	AR	Prod	pH	EC	Mg	Ca	Na	K	Cl	SO4	HCO3	CO3	SAR	ESP	C	N	C/N
	[wt%]	[kg/ha]	[-]	[dS/m]	[cmol/L]								[(cmol/L)1/2]	[%]	[%]	[%]	[-]
	0	5725.5	9.019	0.100556	0.11925	0.19802	0.457783	0.0229769	0.0168729	0.020126	0.516667	0.124444	1.88874	1.92197	1.37631	0.102516	14.8031
	0.5	6052	9.43856	0.265222	0.162691	0.166032	1.50584	0.0182714	0.0225491	0.27283	0.753333	0.462222	5.14688	5.86074	1.20141	0.0812794	17.2111
	1	7418.5	8.96611	0.126	0.132862	0.203099	0.561533	0.011876	0.016362	0.0556578	0.647778	0.0888889	2.38232	2.59555	1.48717	0.0939037	16.9708
	2	8189	8.58978	0.141222	0.228262	0.496263	0.274603	0.0274768	0.0139586	0.348732	0.616667	0.0266667	0.859756	0.932098	1.47532	0.101519	14.8629
	3	9377.5	8.48456	0.145333	0.247351	0.502653	0.231897	0.0658724	0.0160936	0.373237	0.556667	0.00888889	0.61837	0.598791	1.49	0.0897697	16.9378
F3	AR	Prod	pH	EC	Mg	Ca	Na	K	Cl	SO4	HCO3	CO3	SAR	ESP	C	N	C/N
	[wt%]	[kg/ha]	[-]	[dS/m]	[cmol/L]								[(cmol/L)1/2]	[%]	[%]	[%]	[-]
	0	5707.5	8.15556	0.180622	0.0949139	0.244798	0.720133	0.0077725	0.0312346	0.048176	0.665556	0	2.39116	2.20704	1.48891	0.0870747	17.4108
	0.5	7570.5	8.1	0.228467	0.153528	0.286764	0.621063	0.0155215	0.0237579	0.264873	0.593333	0	2.17642	2.25579	1.60478	0.0953252	16.9187
	1	7811	7.98889	0.364889	0.368411	0.907038	1.00378	0.0114209	0.0181252	1.72295	0.605556	0	2.03032	1.69709	1.39851	0.0844816	16.8257
	2	8922.5	7.91667	0.189056	0.275971	0.639527	0.220743	0.00685592	0.0138894	0.839867	0.51	0	0.612882	1.01189	1.54695	0.0966401	16.1257
	3	9985	7.72222	0.512111	0.740439	1.63597	0.638677	0.00779217	0.0220669	3.13701	0.471111	0	0.817303	0.931978	1.90405	0.10419	18.495
F4	AR	Prod	pH	EC	Mg	Ca	Na	K	Cl	SO4	HCO3	CO3	SAR	ESP	C	N	C/N
	[wt%]	[kg/ha]	[-]	[dS/m]	[cmol/L]								[(cmol/L)1/2]	[%]	[%]	[%]	[-]
	0	5189	8.06667	0.191644	0.127662	0.354152	1.2886	0.00400428	0.0147451	0.0433772	0.838111	0.0555556	3.63309	3.89748	1.3241	0.0821419	16.4767
	0.5	6640.5	7.91111	0.538433	0.584237	1.67364	1.30983	0.00521366	0.0125047	2.79602	0.726807	0.0622222	3.62291	3.81759	1.37736	0.0875209	16.159
	1	7685	8.25556	0.240111	0.11832	0.123339	1.01306	0.00889172	0.0250867	0.326944	0.738	0.124444	4.83193	5.43622	1.42313	0.0885206	16.6293
	2	8748	7.75556	0.572556	0.429651	0.874918	0.670001	0.00993252	0.0149373	1.51283	0.474811	0	1.13442	1.34341	1.74258	0.0884547	20.2815
	3	9344.5	7.61111	0.800667	0.574508	1.5237	0.414298	0.0329415	0.016057	1.96554	0.508222	0	0.545667	0.983197	2.17219	0.091929	24.1644
F1-4	AR	Prod	pH	EC	Mg	Ca	Na	K	Cl	SO4	HCO3	CO3	SAR	ESP	C	N	C/N
	[wt%]	[kg/ha]	[-]	[dS/m]	[cmol/L]								[(cmol/L)1/2]	[%]	[%]	[%]	[-]
	0	4872.12	8.67933	0.169372	0.126885	0.240909	0.976075	0.0162414	0.022566	0.0614406	0.725944	0.111667	3.24861	3.43613	1.40036	0.0872511	17.1366
	0.5	6442.62	8.67706	0.333586	0.261608	0.579662	1.27828	0.0171901	0.0176392	0.961461	0.761979	0.142222	4.33134	4.75169	1.49494	0.0952962	16.7696
	1	7345.38	8.60628	0.236111	0.183326	0.348529	0.852849	0.011051	0.0191248	0.565716	0.675056	0.0577778	3.20067	3.44899	1.46349	0.0894974	17.225
	2	8467.79	8.32081	0.271292	0.279848	0.580544	0.500081	0.0153596	0.0136078	0.778043	0.576286	0.00666667	1.35596	1.51405	1.67652	0.0987413	17.4786
	3	9260.12	8.27739	0.421139	0.426074	0.97337	0.594366	0.031121	0.0153474	1.42182	0.561778	0.0433333	1.78774	2.19578	1.78625	0.0932568	20.1755
